# Supplementary material
Source: PubMed Central journal article supplement (PMC7240809)
Supplement: ao0c00310_si_001.pdf [file ao0c00310_si_001.pdf]

## Supporting information

### **Selective Cyclized $\alpha$ -Melanocyte-Stimulating Hormone Derivative with Multiple *N*-methylations for Melanoma Imaging with Positron Emission Tomography**

Chengcheng Zhang,<sup>†</sup> Zhengxing Zhang,<sup>†</sup> Jutta Zeisler,<sup>†</sup> Nadine Colpo,<sup>†</sup> Kuo-Shyan Lin,<sup>†‡</sup> François Bénard<sup>\*†‡</sup>

<sup>†</sup>Department of Molecular Oncology, BC Cancer, Vancouver, BC, Canada

<sup>‡</sup>Department of Radiology, University of British Columbia, Vancouver, BC, Canada

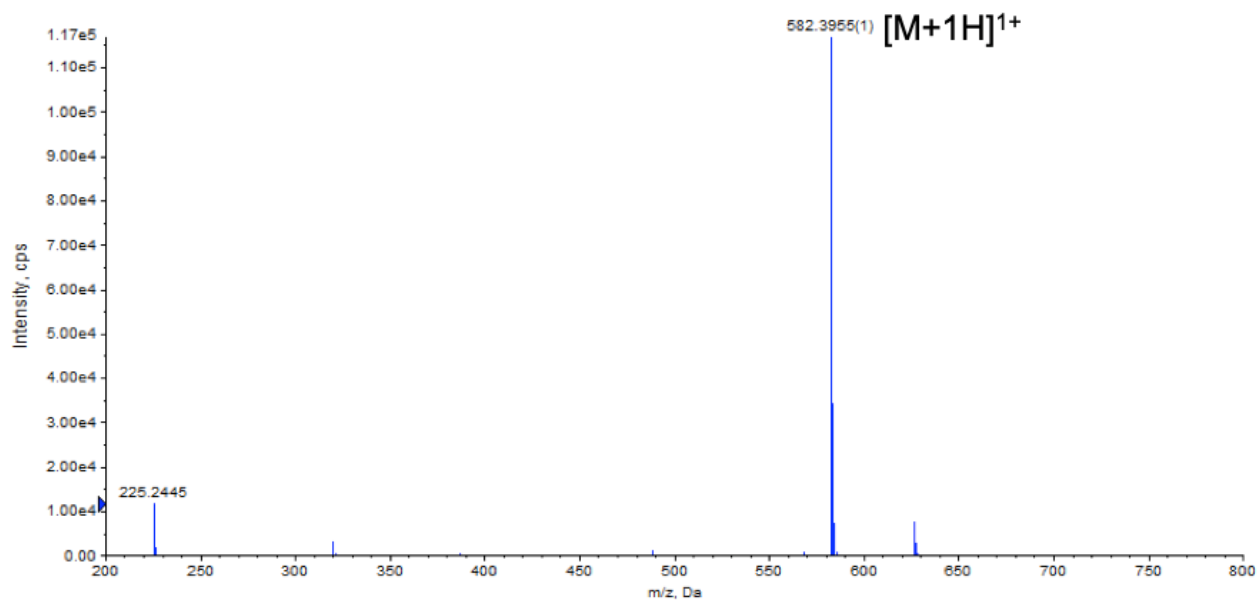

**Supplementary Figure S1.** Mass spectrometry analysis of an intermediate compound Fmoc-*N*-Me-Trp-*N*-Me-Lys-NH<sub>2</sub>. The calculated mass was 582.30 [M+1H]<sup>1+</sup>, found 582.40. No other non-background peak was observed, which indicated the *N*-methylation reaction on the lys<sup>10</sup> residue was complete.

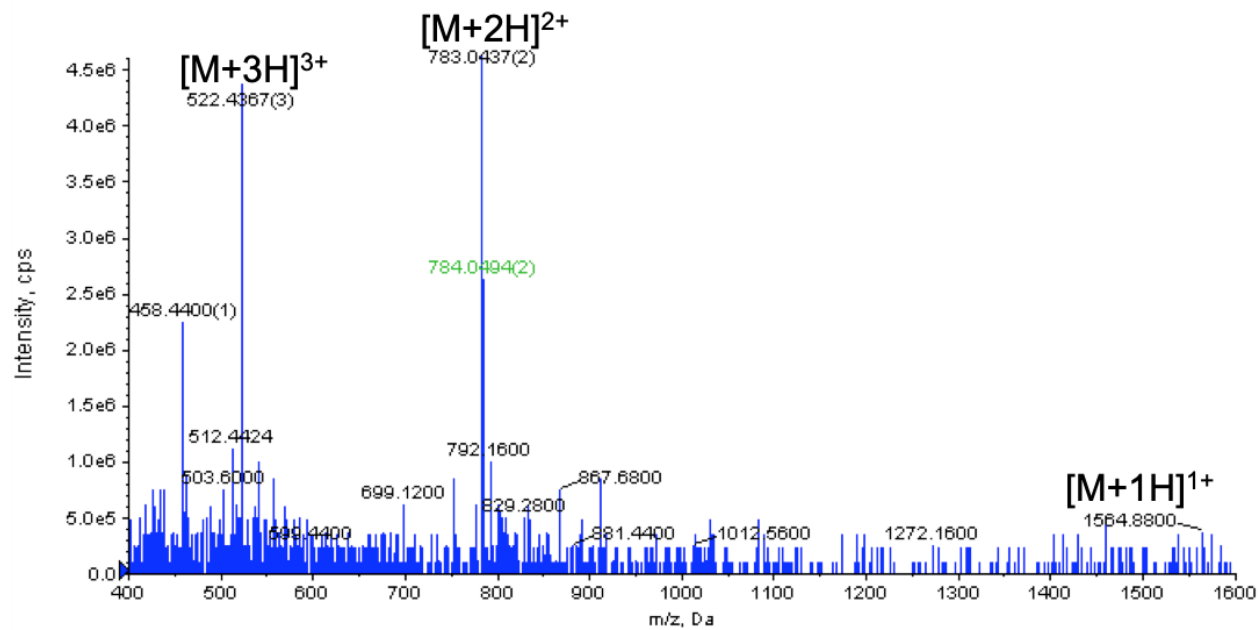

**Supplementary Figure S2.** Mass spectrometry analysis of CCZ01099. Mass calculated 1564.87

$[M+1H]^{1+}$ , found 1564.88.

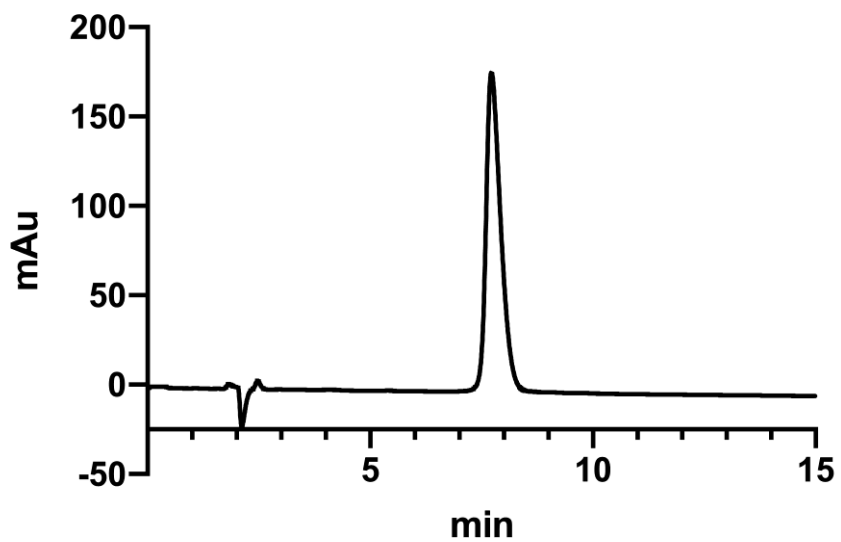

**Supplementary Figure S3.** Analytical HPLC chromatogram for <sup>nat</sup>Ga-CCZ01099 using 21% acetonitrile containing 0.1% TFA at a flow rate of 2 mL/min. The retention time was 7.7 min. Purity was > 99%.

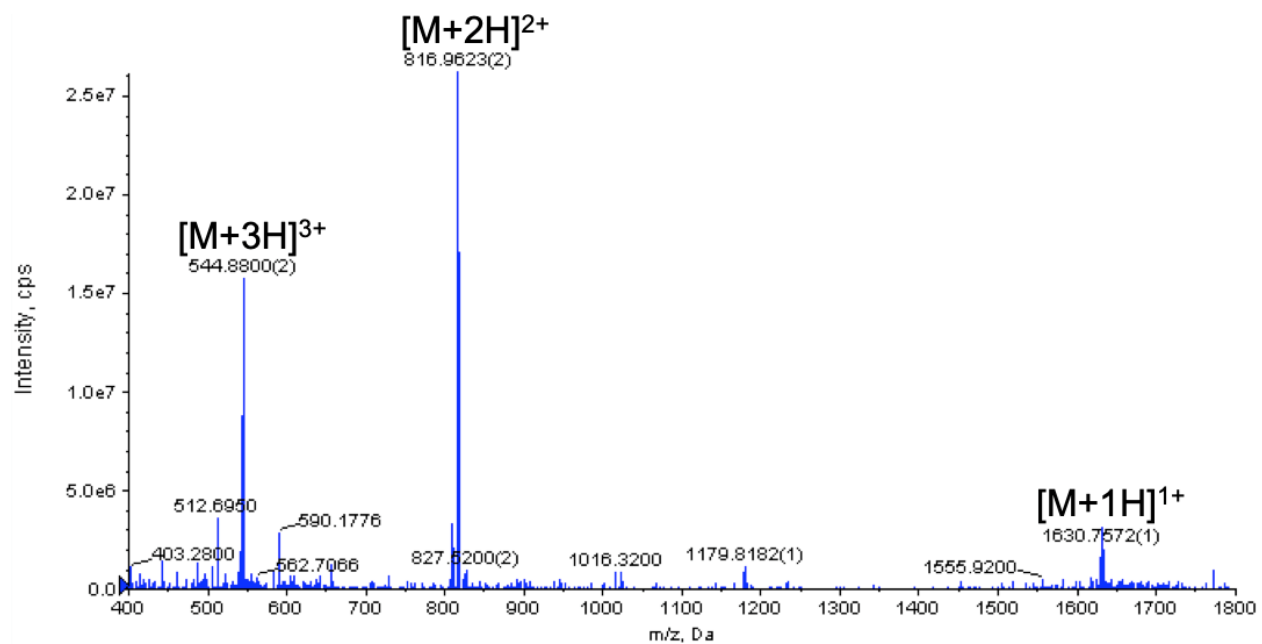

**Supplementary Figure S4.** Mass spectrometry analysis of non-radioactive gallium-conjugated CCZ01099. Mass calculated 1630.78 [M+1H]<sup>1+</sup>, found 1630.76.

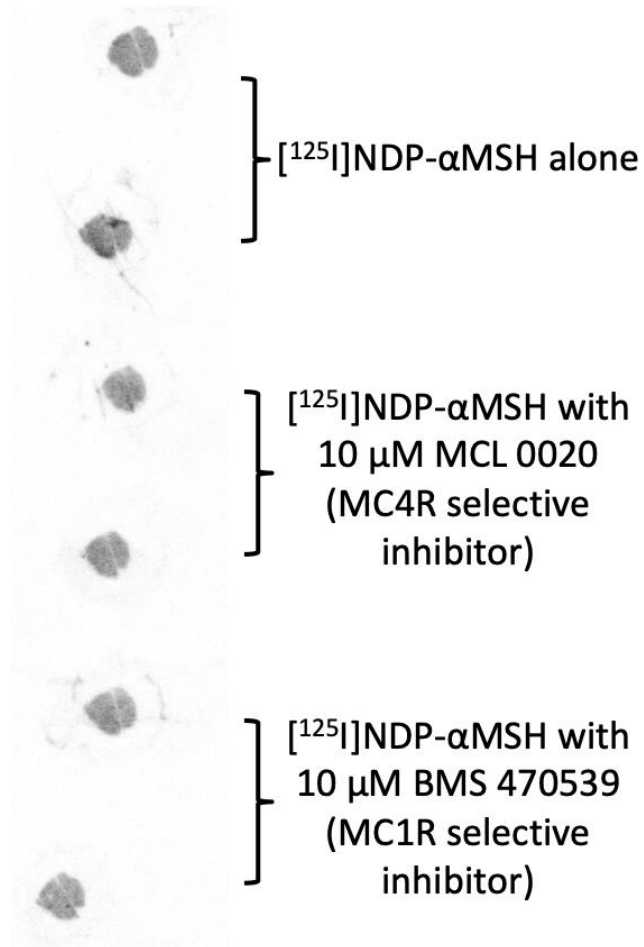

**Supplementary Figure S5.** Autoradiography on mouse thyroid tissue incubated with [<sup>125</sup>I]NDP-αMSH without or with MC1R or MC4R inhibitors. Experiments were performed in duplicates.

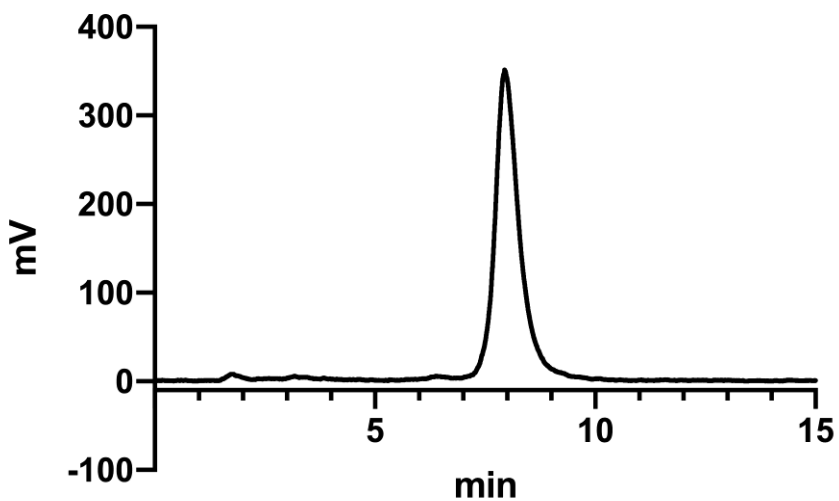

**Supplementary Figure S6.** Analytical radio-HPLC chromatogram for [ $^{68}\text{Ga}$ ]Ga-CCZ01099 using 21% acetonitrile containing 0.1% TFA at a flow rate of 2 mL/min. The retention time was 7.9 min. Radiochemical purity was > 99%.

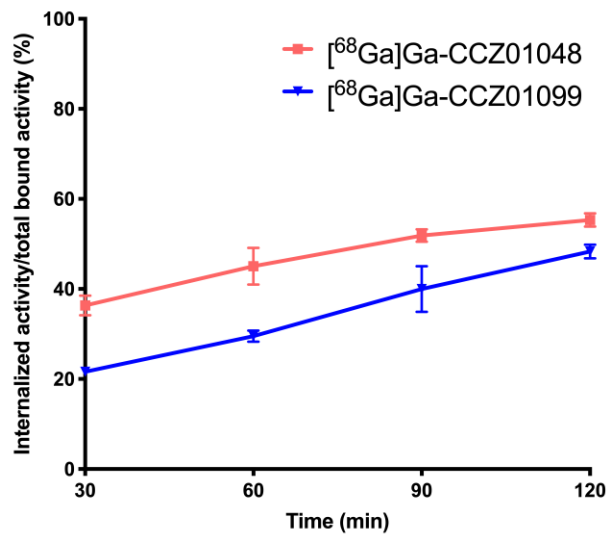

**Supplementary Figure S7.** Internalization assay of [ $^{68}\text{Ga}$ ]Ga-CCZ01048 (n = 3) and [ $^{68}\text{Ga}$ ]Ga-CCZ01099 (n = 4) on B16-F10 melanoma cell line.
